# Supplementary material
Source: PubMed Central journal article supplement (PMC8855765)
Supplement: ccm-50-0440-s002.pdf [file ccm-50-0440-s002.pdf]

*Supplemental Figure 1: Prevalence of burnout symptoms by time in practice at the institution.*
